# Supplementary material for: Transcription leads to pervasive replisome instability in bacteria
Source: eLife journal article supplement (doi:10.7554/elife.19848), 2017-01-16
Supplement: supp [file elife-19848-supp-v1.zip]

Archive with 24 entries (24 files):
- elife_poa_e19848_Figure_4_figure_supplement_2.pdf
- elife_poa_e19848_Figure_1_figure_supplement_2.pdf
- elife_poa_e19848_Figure_5_figure_supplement_1.pdf
- elife_poa_e19848_Figure_1_figure_supplement_3.pdf
- elife_poa_e19848_Figure_1_figure_supplement_6.pdf
- elife_poa_e19848_Figure_7_figure_supplement_3.pdf
- elife_poa_e19848_Figure_7_figure_supplement_1.pdf
- elife_poa_e19848_Figure_5_figure_supplement_2.pdf
- elife_poa_e19848_Figure_3_figure_supplement_3.pdf
- elife_poa_e19848_Figure_7_figure_supplement_2.pdf
- elife_poa_e19848_Figure_2_figure_supplement_3.pdf
- elife_poa_e19848_Figure_7_figure_supplement_5.pdf
- elife_poa_e19848_Figure_1_figure_supplement_1.pdf
- elife_poa_e19848_Figure_2_figure_supplement_1.pdf
- elife_poa_e19848_Figure_5_source_data_1.xlsx
- elife_poa_e19848_Supplementary_File_1.pdf
- elife_poa_e19848_Figure_1_figure_supplement_4.pdf
- elife_poa_e19848_Figure_2_source_data_1.xlsx
- elife_poa_e19848_Figure_3_figure_supplement_1.pdf
- elife_poa_e19848_Figure_4_figure_supplement_1.pdf
- elife_poa_e19848_Figure_3_figure_supplement_2.pdf
- elife_poa_e19848_Figure_2_figure_supplement_2.pdf
- elife_poa_e19848_Figure_7_figure_supplement_4.pdf
- elife_poa_e19848_Figure_1_figure_supplement_5.pdf
