# Supplementary material for: Transcription leads to pervasive replisome instability in bacteria
Source: eLife journal article supplement (doi:10.7554/elife.19848), 2017-01-16
Supplement: supp [file elife-19848-supp-v1.zip › elife_poa_e19848_Figure_2_source_data_1.xlsx]

## Sheet: Lifetime
Figure 2-Source data 1
List of helicase complex lifetimes under each of the conditions tested. All complexes lasting the duration of the imaging are marked as having a 22 min lifetime, but actual lifetime could not be observed.
WT Lifetime (min)	Rif Lifetime (min)	RpoB* lifetime (min)
18	18	22
6	22	12
8	16	22
22	22	22
6	20	12
4	22	22
18	22	16
10	18	22
18	22	22
12	22	20
6	22	22
4	14	18
12	22	22
20	16	22
4	10	20
22	22	10
14	20	14
4	16	22
6	22	18
12	22	16
6	22	22
8	22	22
6	10	4
16	12	22
20	22	22
4	12	8
18	4	22
10	22	22
22	18	22
4	6	14
6	8	14
4	6	22
18	14	20
6	22	16
20	20	22
12	18	22
10	22	22
6	22	22
6	22	22
18	22	8
10	22	22
10	14	22
12	22	22
6	4	22
10	22	22
22	22	22
12	20	22
10	14	6
10	8	22
6	14	14
14	14	22
14	22	22
8	20	12
20	10	22
10	22	8
14	22	22
22	22	14
4	22	22
18	22	22
14	22	22
22	8	6
18	18	22
22	22	16
6	4	22
16	22	22
20	22	6
18	22	8
16	22	22
14	16	6
4	12	22
12	8	12
4	22	16
8	22	18
8	16	22
18	16	14
4	8	10
6	10	14
8	22	16
8	22	22
6	10	20
8	12	6
4	22	22
18	22	22
16	22	22
8	22	10
18	22	22
6	22	12
14	22	22
14	16	18
6	22	22
10	22	18
14	16	22
20	22	22
8	22	16
6	22	18
8	18	10
4	22	4
8	22	4
14	14	22
12	14	22
8	22	22
6	22	12
10	8	22
6	22	12
4	20	6
8	22	22
14	14	8
8	22	22
8	12	8
16	12	20
8	20	12
6	22	12
8	4	4
8	22	10
8	22	12
10	8	12
4	8	4
4	8	20
4	22	8
4	22	4
8	12	8
10	20	16
22	22	6
22	18	22
4	12	18
6	22	12
10	22	10
20	22	12
14	22	22
8	14	22
12	18	22
4	14	12
12	22	4
4	22	10
18	10	16
4	22	18
10	6	22
8	6	18
4	22	22
8	22	20
16	20	22
8	6	18
16	16	20
6	20	22
16	22	8
22	22	20
4	10	8
4	22	12
8	22	18
4	22	6
8	18	6
12	22	6
12	22	22
12	8	22
12	20	14
4	6	22
10	8	18
18	22	20
16	22	10
8	8	22
16	18	12
8	12	18
22	22	22
8	22	10
4	22	20
4	22
16	14
14	22
8	12
8	6
14	22
22	22
16	22
14	22
22	8
14	22
4	22
20	22
14	14
20	22
4	22
20	20
18	10
16
12
16
6
8
12
6
4
8
6
14
6
6
10
14
16
22
6
22
18
8
20
18
6
12
14
22
22
4
18
12
6
8
8
8
8
6
12
4
16
18
8
6
4
6
8
10
16
10
4
22
12
22
10
4
16
22
10
10
8
18
4
8
18
8
4
6
20
22
22
16
22
18
22
20
14
20
4
20
16
10
20
4
22
4
10
18
22
8
10
10
8
18
12
4
6
8
12
18
10
12
4
8
22
8
6
6
16
6
10
6
16
12
22
8
10
8
14
4
22
18
16
10
4
4
20
4
6
6
12
16
16
20
6
10
18
6
10
22
22
6
16
12
6
