# Supplementary material for: Transcription leads to pervasive replisome instability in bacteria
Source: eLife journal article supplement (doi:10.7554/elife.19848), 2017-01-16
Supplement: supp [file elife-19848-supp-v1.zip › elife_poa_e19848_Figure_5_source_data_1.xlsx]

## Sheet: Lifetime
Figure 5-Source data 1
List of helicase complex lifetimes under each of the conditions tested. All complexes lasting the duration of the imaging are marked as having a 20 min lifetime, but actual lifetime could not be observed.
WT Lifetime (min)	Rif Lifetime (min)
6	20
14	18
20	18
18	20
6	20
20	10
20	8
6	10
6	16
6	20
20	20
12	20
12	18
6	20
6	14
16	6
12	20
10	20
20	14
10	20
12	20
10	6
12	8
20	16
8	4
10	10
14	20
8	20
20	20
4	16
8	20
20	12
4	4
18	20
20	8
6	4
14	18
12	20
8	20
6	20
4	20
8	12
20	16
4	18
14	20
20	18
18	20
8	20
6	18
20	20
20	14
8	12
8	16
14	18
20	20
16	20
20	20
6	10
12	20
18	14
6	20
20	16
20	20
12	20
8	20
20	20
4	4
16	8
8	14
20	4
12	20
10	8
20	14
14	12
12	20
10	18
16	14
20
20
8
20
6
16
10
16
10
6
10
6
6
20
20
14
18
12
10
4
14
12
20
20
20
4
8
20
12
20
6
10
20
20
6
16
20
4
16
10
20
20
20
8
8
8
20
10
12
12
6
8
14
6
8
20
20
18
14
12
6
18
10
12
6
8
4
6
16
14
10
4
4
10
4
12
4
4
12
10
8
4
14
4
10
20
8
8
6
20
10
10
8
20
4
16
10
4
8
6
8
6
10
10
12
8
6
8
14
6
4
4
4
20
6
20
12
10
18
4
6
4
8
8
6
20
8
4
10
20
10
6
4
4
4
8
6
6
8
4
