# Supplementary figures and images for: Transcription leads to pervasive replisome instability in bacteria
Source: eLife journal article supplement (doi:10.7554/elife.19848), 2017-01-16

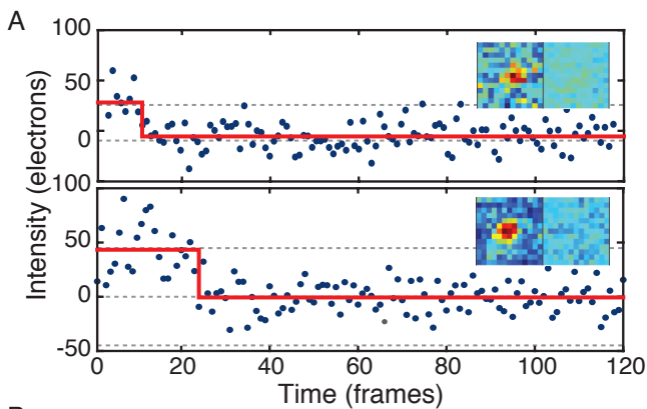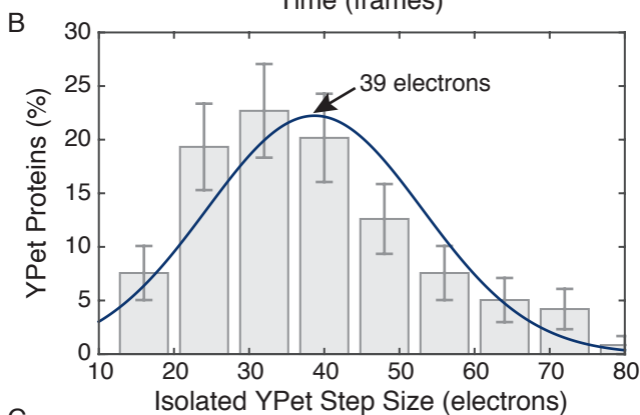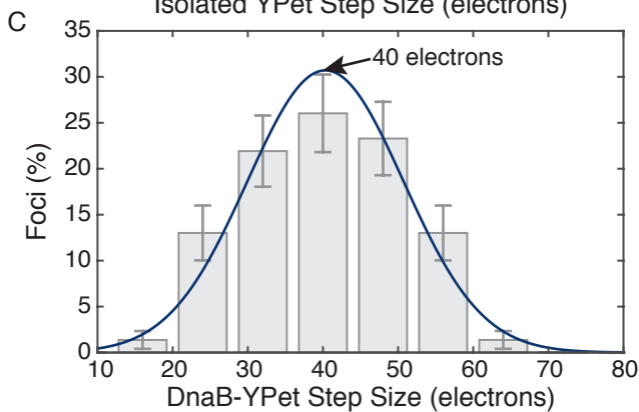

Supplement: supp [file elife-19848-supp-v1.zip › elife_poa_e19848_Figure_4_figure_supplement_2.pdf]

A

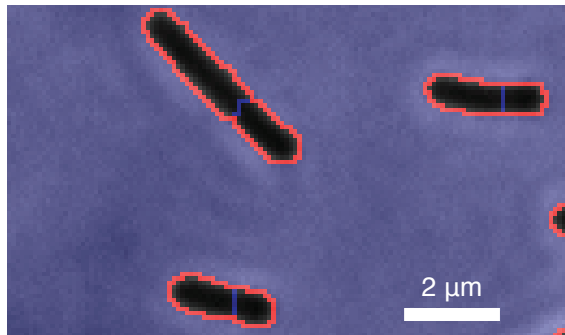

B

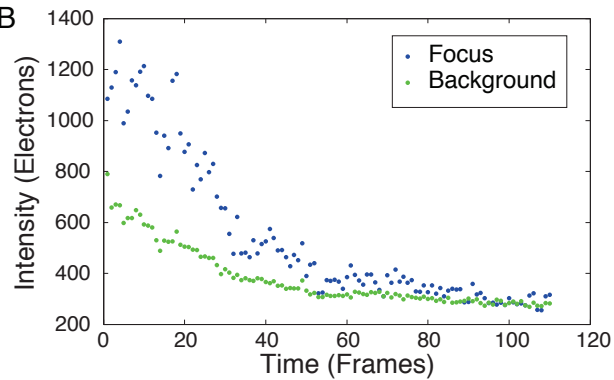

C

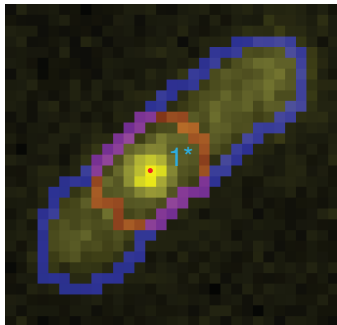

D

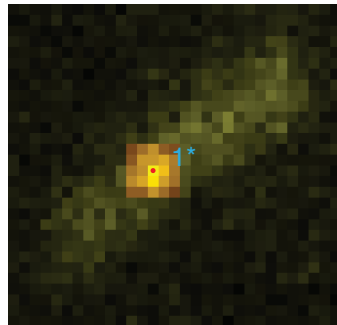

Supplement: supp [file elife-19848-supp-v1.zip › elife_poa_e19848_Figure_1_figure_supplement_2.pdf]

A

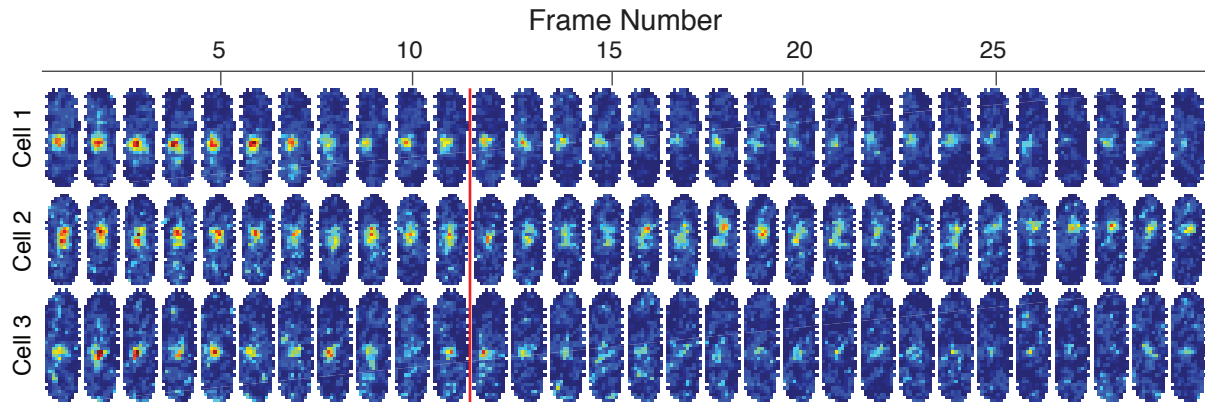

B

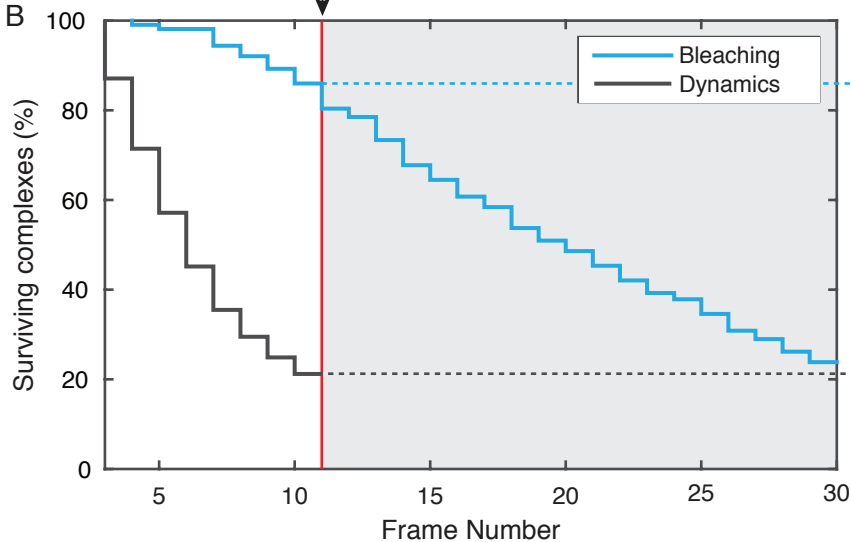

C

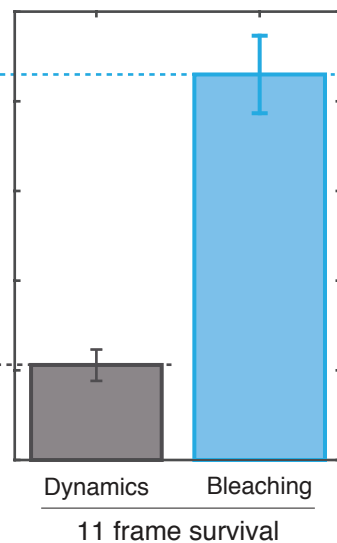

Supplement: supp [file elife-19848-supp-v1.zip › elife_poa_e19848_Figure_5_figure_supplement_1.pdf]

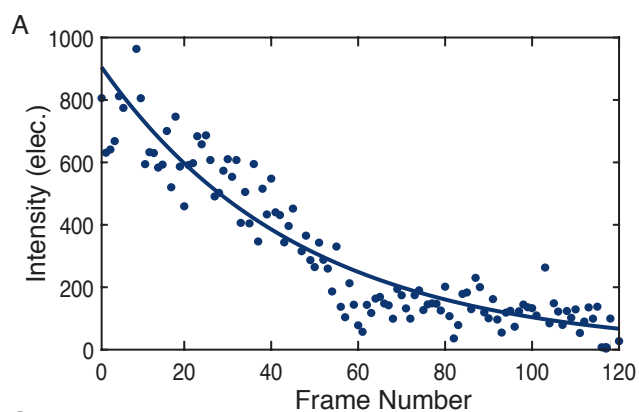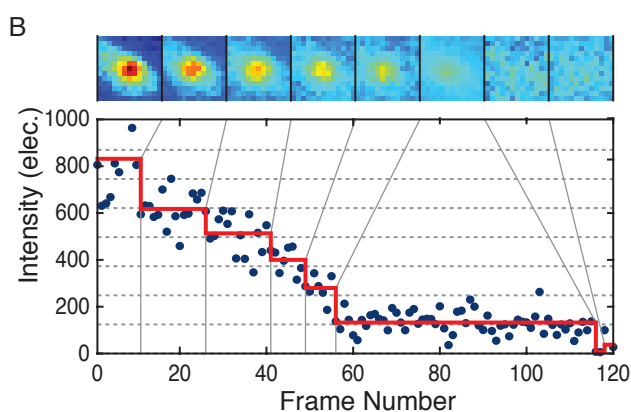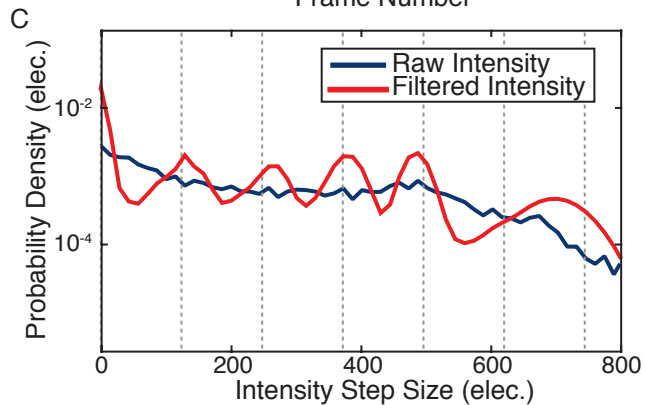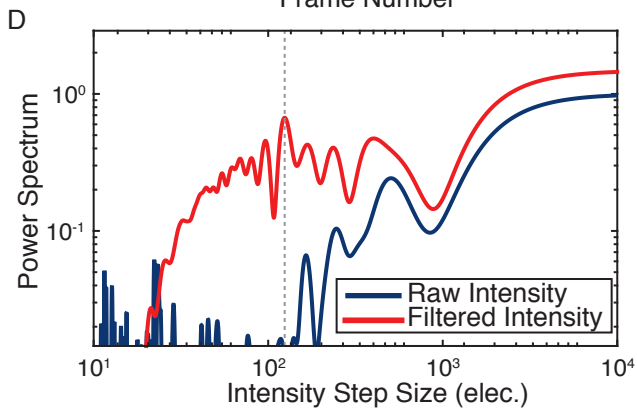

Supplement: supp [file elife-19848-supp-v1.zip › elife_poa_e19848_Figure_1_figure_supplement_3.pdf]

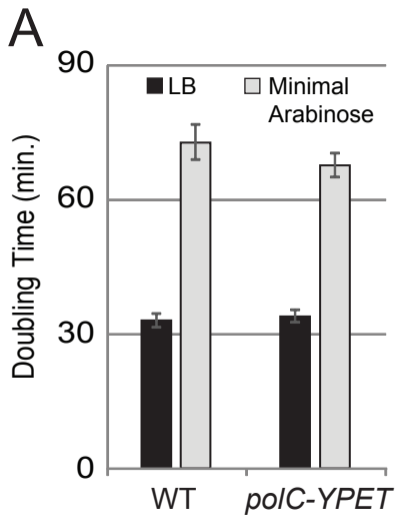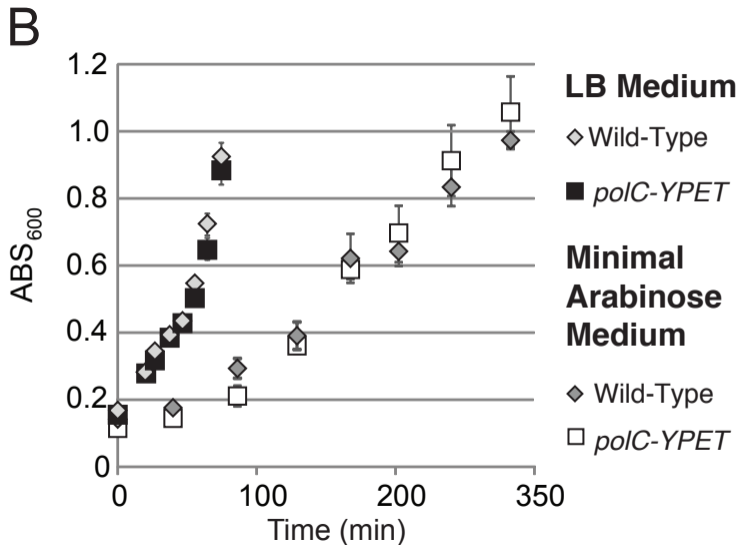

Supplement: supp [file elife-19848-supp-v1.zip › elife_poa_e19848_Figure_1_figure_supplement_6.pdf]

A

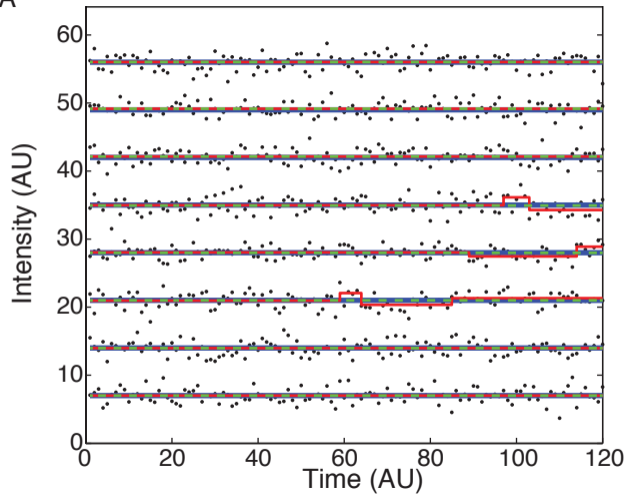

• Data      - - - CP  
— True Mean      — KV

B

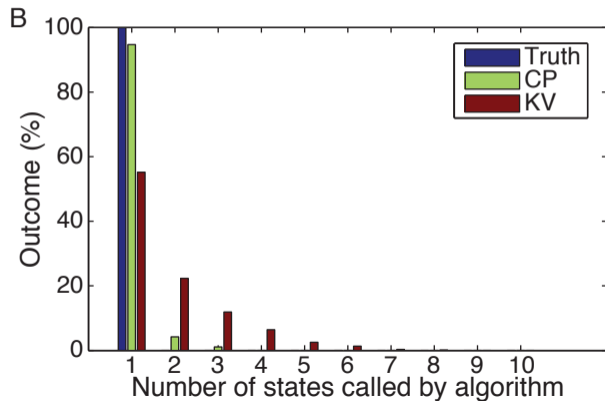

Supplement: supp [file elife-19848-supp-v1.zip › elife_poa_e19848_Figure_7_figure_supplement_3.pdf]

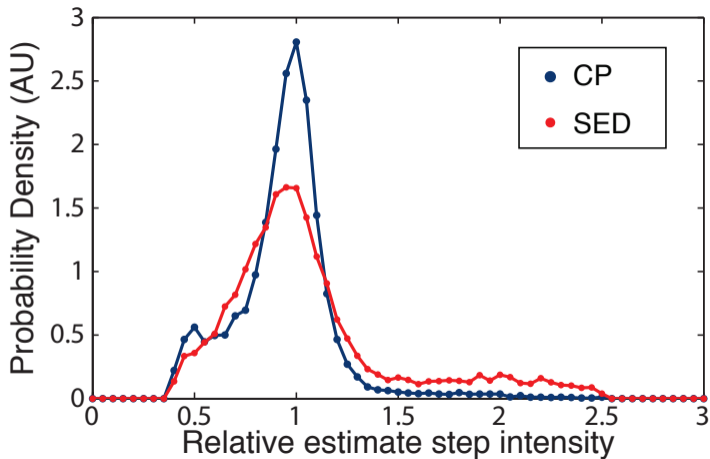

Supplement: supp [file elife-19848-supp-v1.zip › elife_poa_e19848_Figure_7_figure_supplement_1.pdf]

A

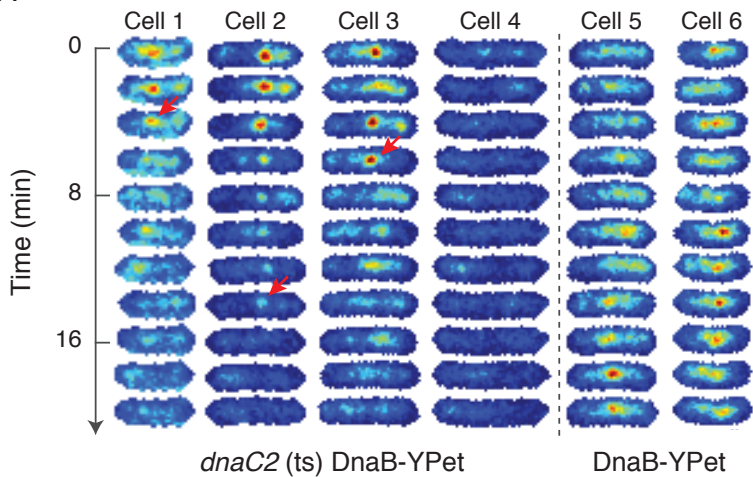

B

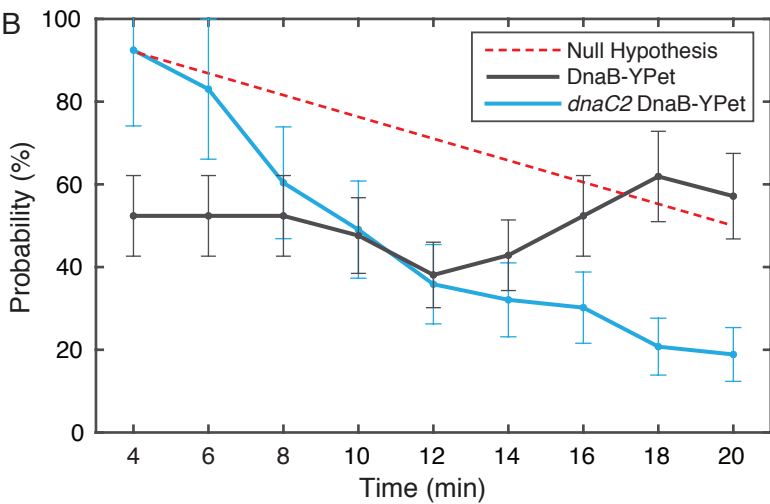

Supplement: supp [file elife-19848-supp-v1.zip › elife_poa_e19848_Figure_5_figure_supplement_2.pdf]

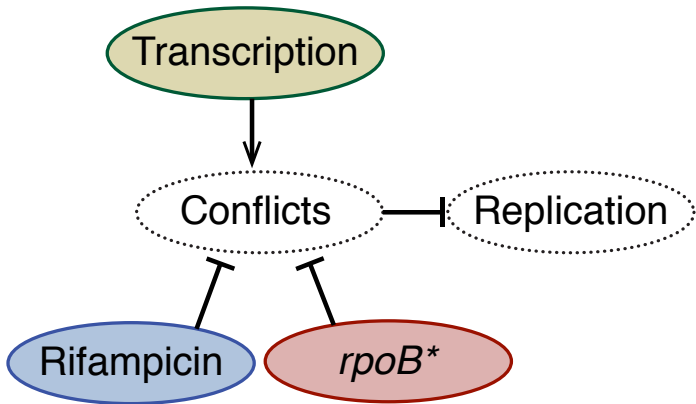

Supplement: supp [file elife-19848-supp-v1.zip › elife_poa_e19848_Figure_3_figure_supplement_3.pdf]

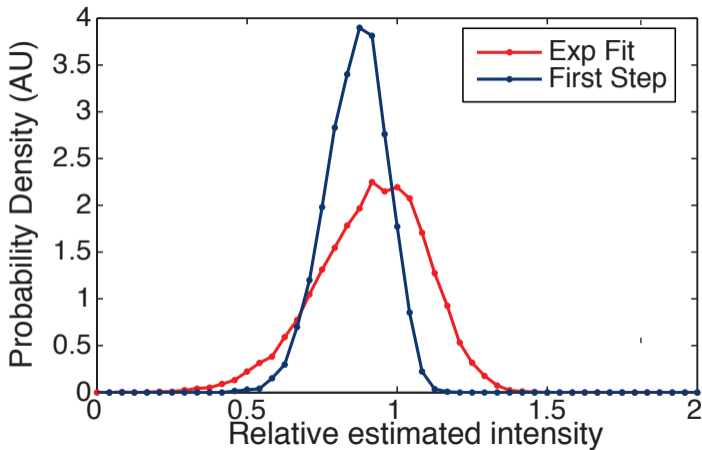

Supplement: supp [file elife-19848-supp-v1.zip › elife_poa_e19848_Figure_7_figure_supplement_2.pdf]

A

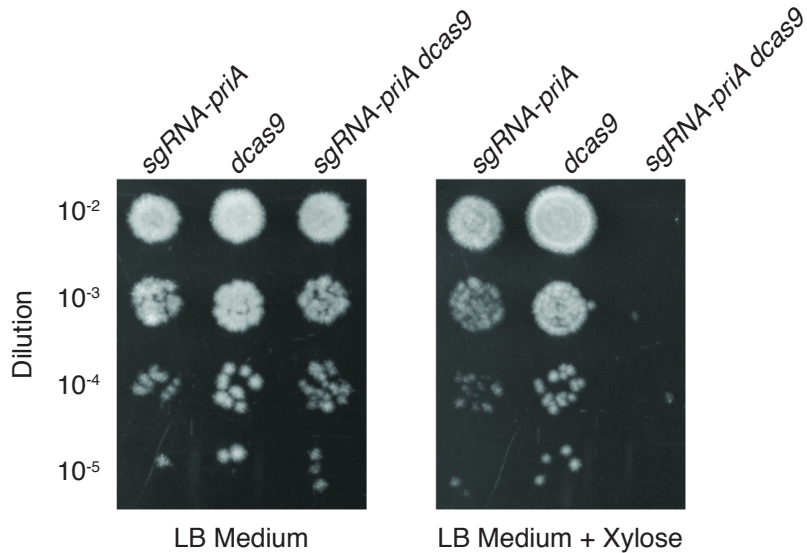

B

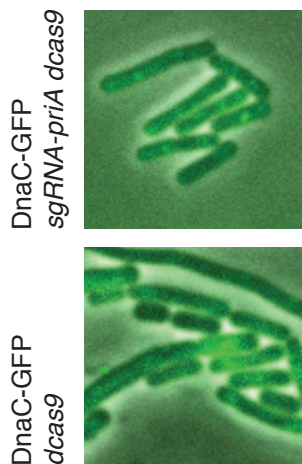

C

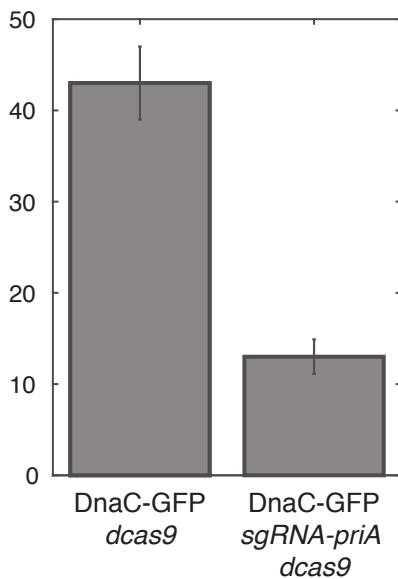

Supplement: supp [file elife-19848-supp-v1.zip › elife_poa_e19848_Figure_2_figure_supplement_3.pdf]

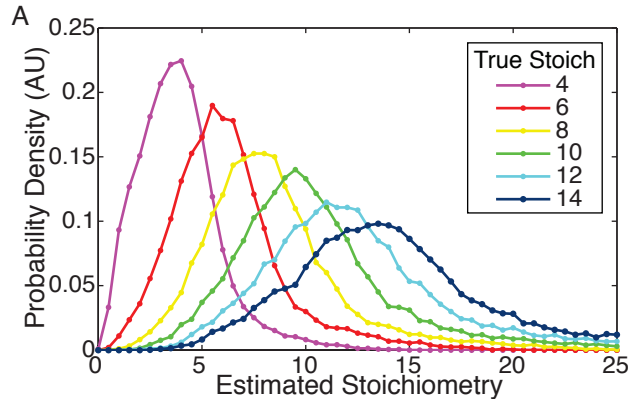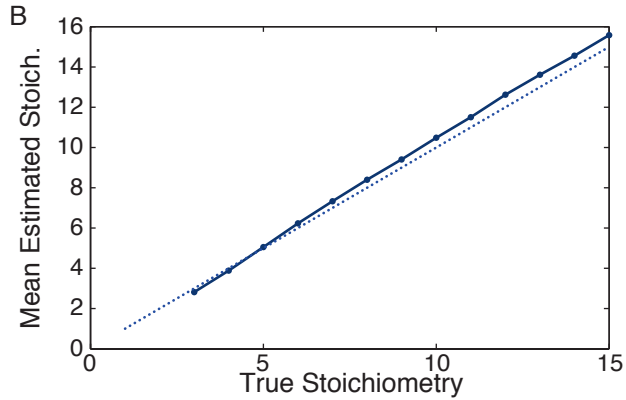

Supplement: supp [file elife-19848-supp-v1.zip › elife_poa_e19848_Figure_7_figure_supplement_5.pdf]

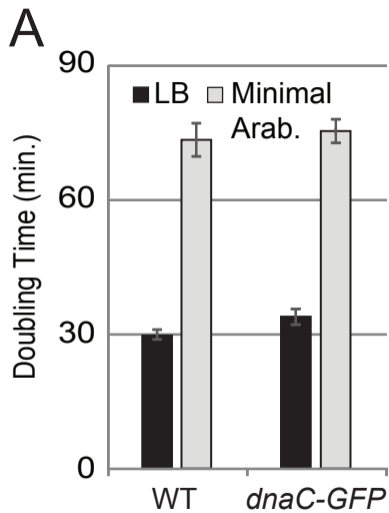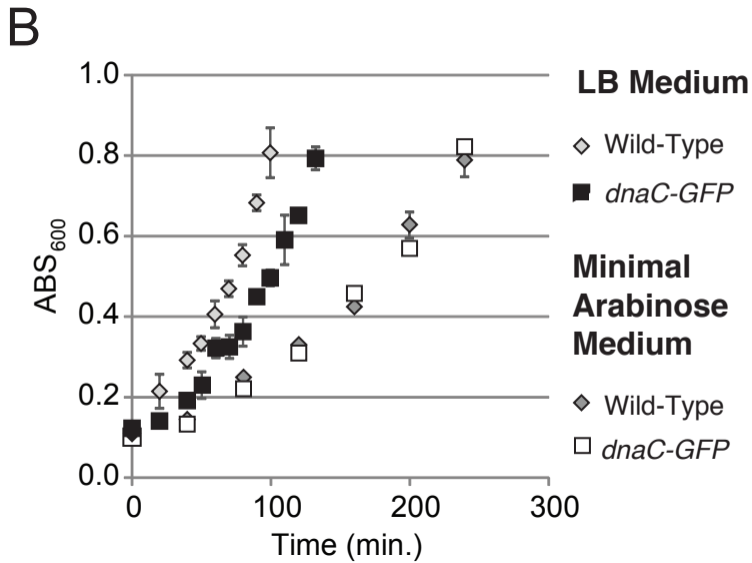

Supplement: supp [file elife-19848-supp-v1.zip › elife_poa_e19848_Figure_1_figure_supplement_1.pdf]

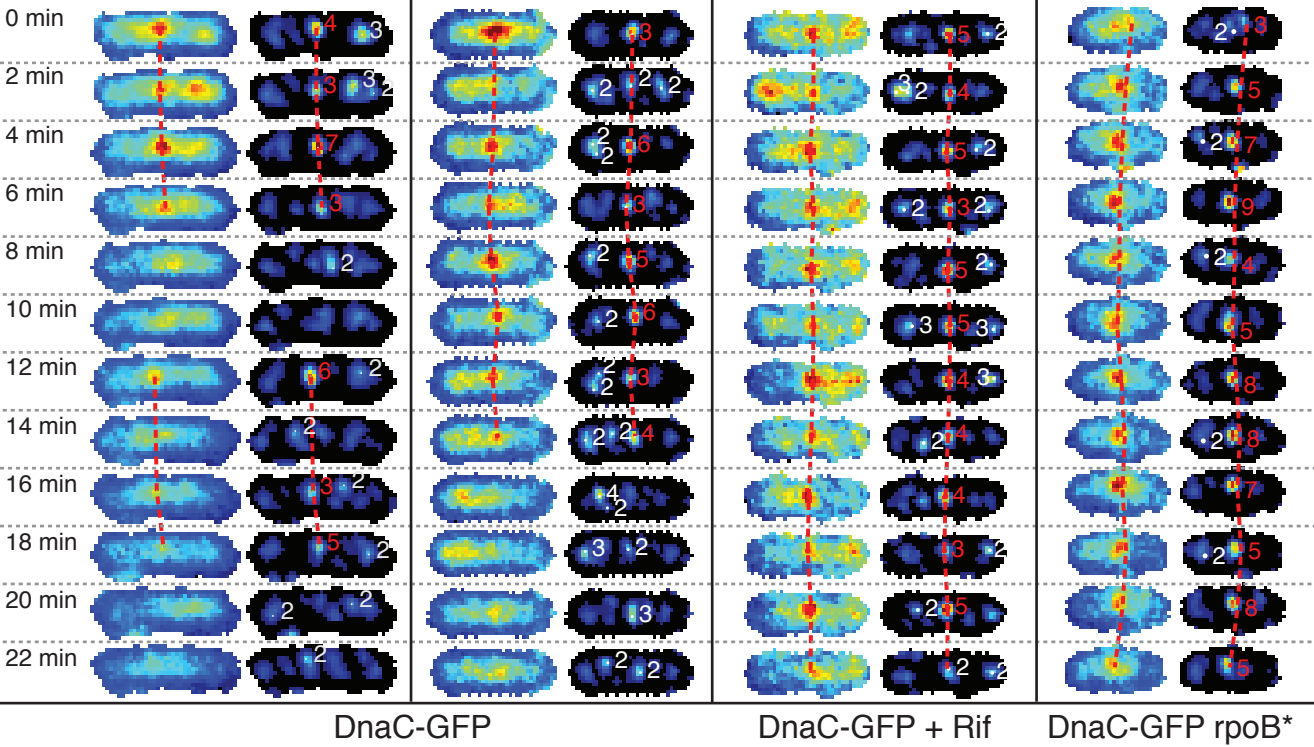

Supplement: supp [file elife-19848-supp-v1.zip › elife_poa_e19848_Figure_2_figure_supplement_1.pdf]

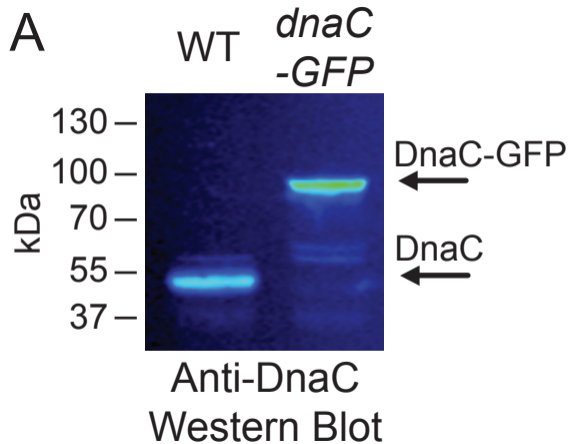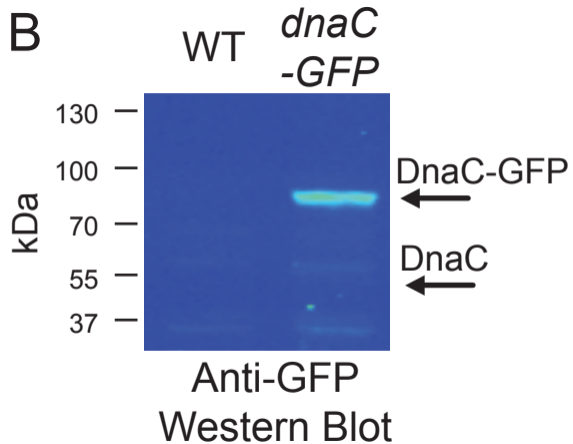

Supplement: supp [file elife-19848-supp-v1.zip › elife_poa_e19848_Figure_1_figure_supplement_4.pdf]

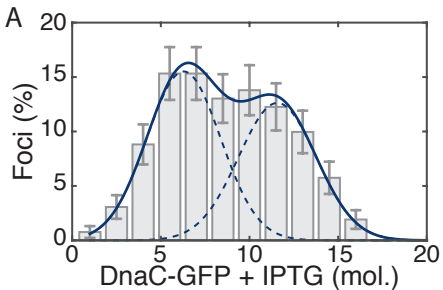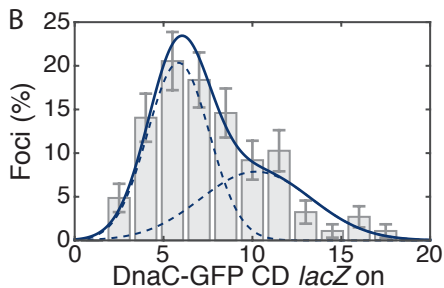

Supplement: supp [file elife-19848-supp-v1.zip › elife_poa_e19848_Figure_3_figure_supplement_1.pdf]

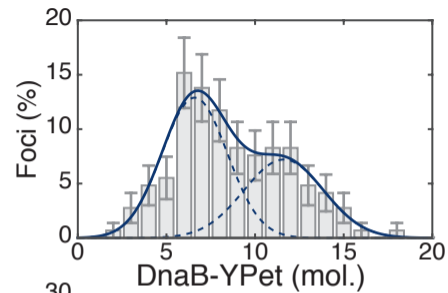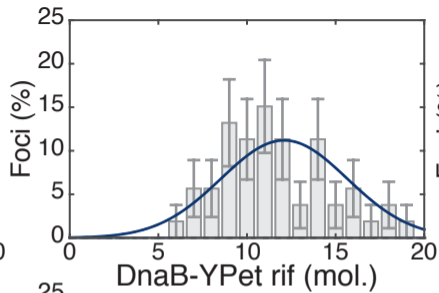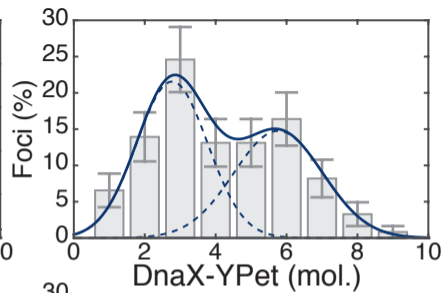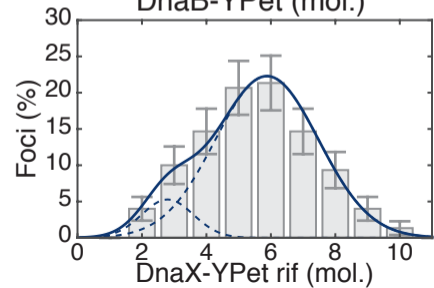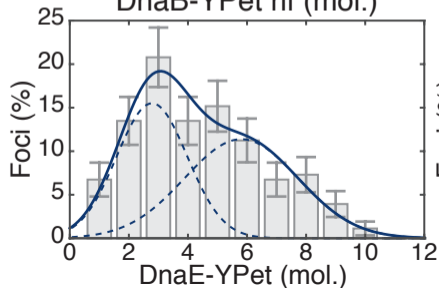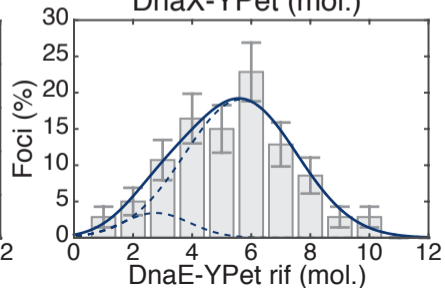

Supplement: supp [file elife-19848-supp-v1.zip › elife_poa_e19848_Figure_4_figure_supplement_1.pdf]

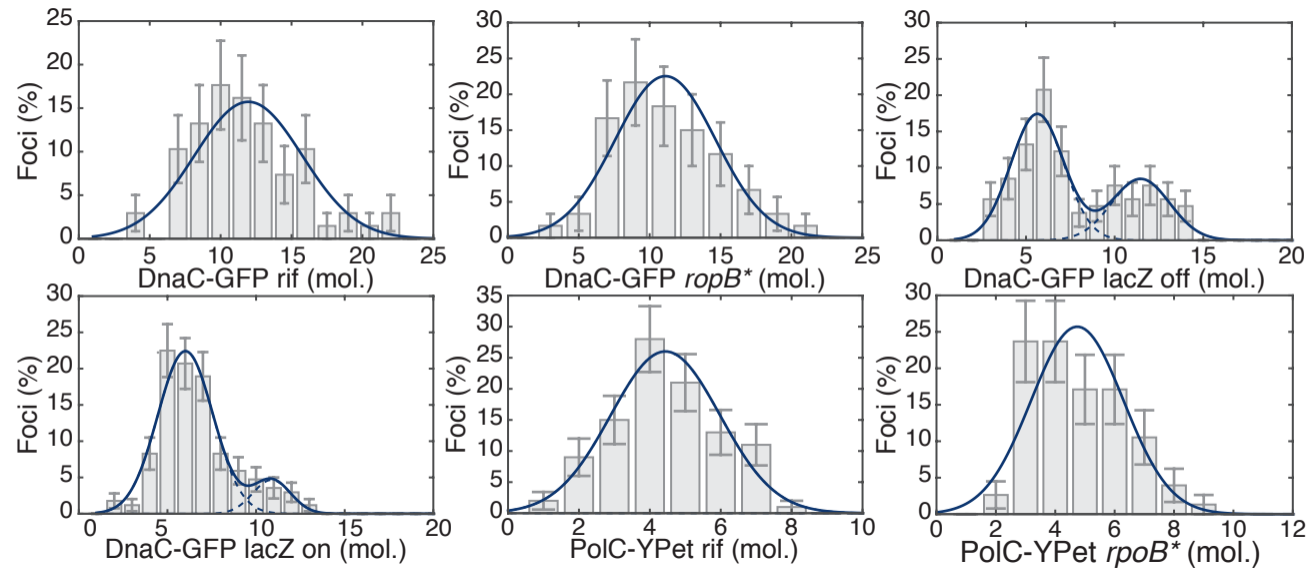

Supplement: supp [file elife-19848-supp-v1.zip › elife_poa_e19848_Figure_3_figure_supplement_2.pdf]

A

Frame Number

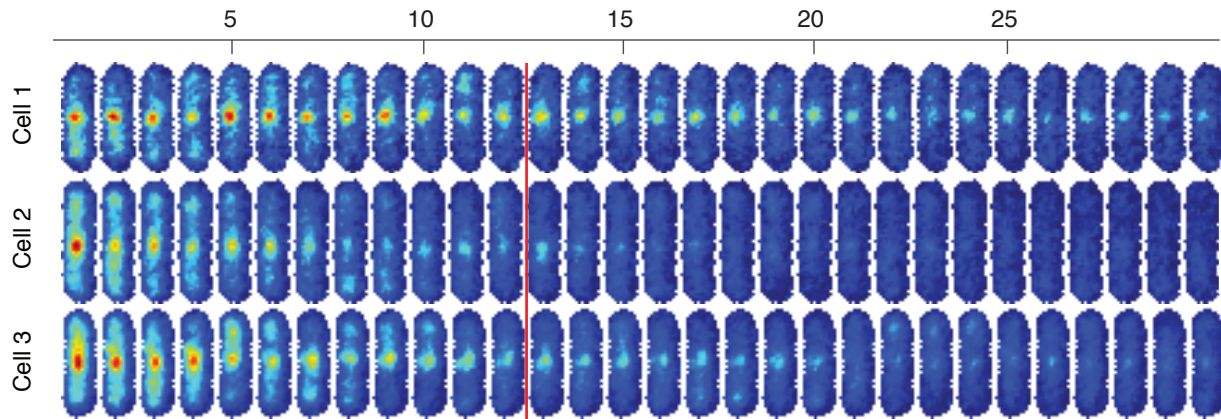

B

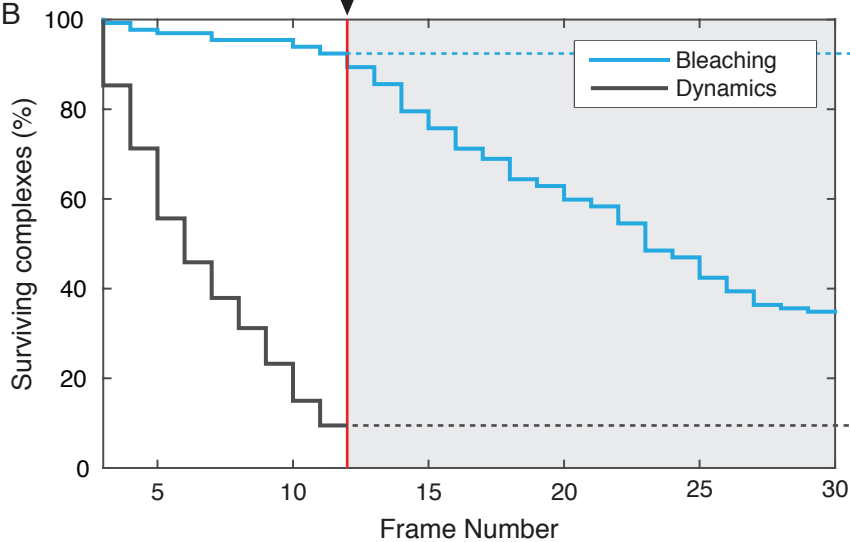

C

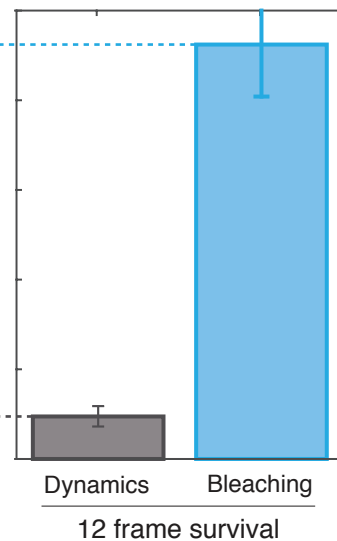

Supplement: supp [file elife-19848-supp-v1.zip › elife_poa_e19848_Figure_2_figure_supplement_2.pdf]

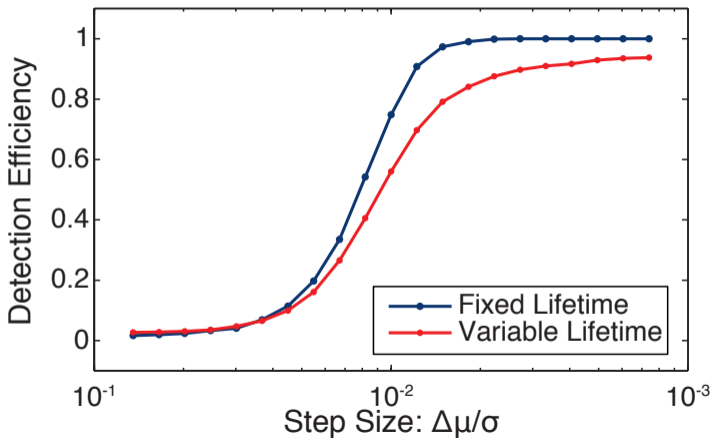

Supplement: supp [file elife-19848-supp-v1.zip › elife_poa_e19848_Figure_7_figure_supplement_4.pdf]

A

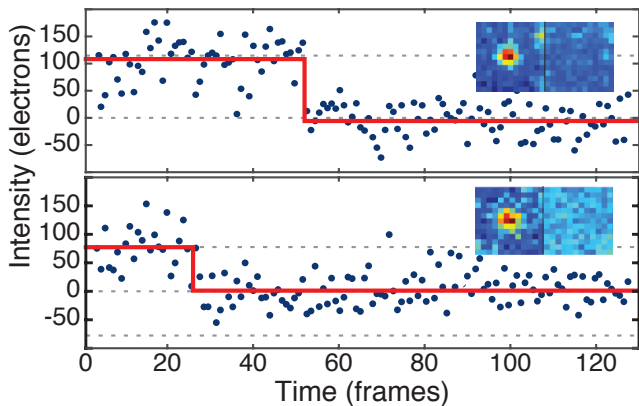

B

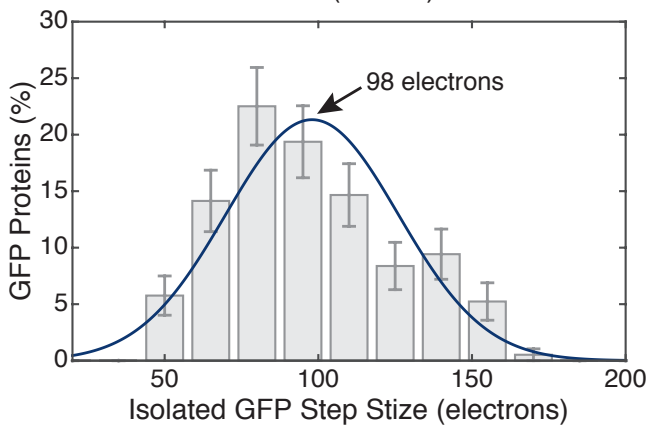

C

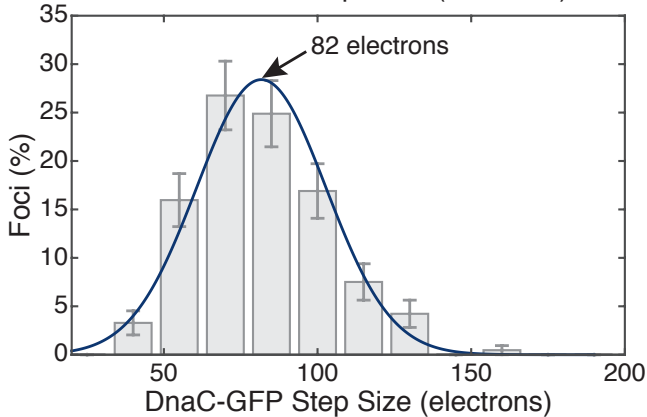

Supplement: supp [file elife-19848-supp-v1.zip › elife_poa_e19848_Figure_1_figure_supplement_5.pdf]
